# Supplementary material for: Insertion of pyridine into an iron–silicon bond: structure of the product Cp*(CO)Fe{η3(C,C,C)-C5H5NSiMe2NPh2}
Source: Royal Society of Chemistry journal article supplement (doi:10.1039/b308885e), 2003-01-01
Supplement: b308885e.doc [file b308885e.doc]

**Electronic Supplementary Information for**

**Insertion of Pyridine into an Iron–Silicon Bond: Structure of the Product Cp*(CO)Fe{**3(*C,C,C*)-C5H5NSiMe2NPh2}**

Masatoshi Iwata, Masaaki Okazaki,* and Hiromi Tobita*

Department of Chemistry, Graduate School of Science, Tohoku University, Sendai 980-8578, Japan

E-mail: [*okazaki@inorg.chem.tohoku.ac.jp*](mailto:okazaki@inorg.chem.tohoku.ac.jp) (MO), [*tobita@inorg.chem.tohoku.ac.jp*](mailto:tobita@inorg.chem.tohoku.ac.jp) (HT).

**Synthesis of Cp*(CO)(C5H5N)FeSiMe2NPh2 (2).** A Pyrex tube (15 mm o.d.) equipped with a greaseless vacuum valve was charged with Cp*(CO)2FeSiMe2NPh2 (153 mg, 0.323 mmol) and connected to a vacuum line. Pyridine (2 mL, excess) and toluene (15 mL) were introduced into the tube under high vacuum by the trap-to-trap-transfer technique. After sealing the tube off from the vacuum line, the contents were irradiated with a 450 W medium-pressure Hg lamp for 90 min with degassing on a vacuum line by the conventional freeze-pump-thaw technique every 30 min.The yellow solution gradually turned dark red. Volatiles were removed under reduced pressure, and the tube was flame-sealed. The tube was then re-opened under N2 in a glovebox. The residue was extracted with toluene (3 mL × 3), and the dark red extract was filtered through a Celite pad and concentrated in vacuo. Recrystallization of the residue from toluene/hexane (1:1) at –30 ºC gave dark red crystals of **2**. Yield 122 mg (72%).

1H NMR (300 MHz, benzene-*d*6) ** 0.59, 0.60 (s, 3H×2, SiMe2), 1.39 (s, 15H, C5Me5), 5.96 (t, 3*J*HH = 7.2 Hz, 2H, **-NC5H5), 6.44 (t, 3*J*HH = 7.2 Hz, 1H, **-NC5H5), 6.88 (t, 3*J*HH = 7.2 Hz, 2H, *p*-NPh2), 7.15 (t, 3*J*HH = 7.2 Hz, 4H, *m*-NPh2), 7.22 (d, 3*J*HH = 7.2 Hz, 4H, *o*-NPh2), 8.34 (d, 3*J*HH = 7.2 Hz, 2H, **-NC5H5); 13C{1H} NMR (75.5 MHz, benzene-*d*6) **7.1, 8.3 (SiMe2), 9.6 (C5*Me*5), 90.7 (*C*5Me5), 121.5 (**-NC5H5), 122.8 (*p*-NPh2), 127.7 (*o*-NPh2), 128.6 (*m*-NPh2), 133.4 (**-NC5H5), 153.1 (*ipso*-NPh2), 157.1 (**-NC5H5), 225.4 (CO); 29Si{1H} NMR (59.6 MHz, benzene-*d*6) ** 53.5; IR (benzene-*d*6, cm-1) 1867 (vs, **CO); EI-Mass (70 eV) *m*/*z* 524 (11, M+), 496 (15, M+–CO), 305 (84, M+–Cp*–Fe–CO), 270 (13, M+–CO–SiMe2NPh2), 226 (100, [SiMe2NPh2]+); Anal. Calc. for C30H36FeN2OSi: C: 68.69, H: 6.92, N: 5.34. Found: C: 68.87, H: 7.12, N: 5.08.

**Synthesis of Cp*(CO)Fe{*3(C,C,C)*-C5H5NSiMe2NPh2} (3).** A Pyrex tube (10 mm o.d.) equipped with a greaseless vacuum valve was charged with **2** (40 mg, 76 mol), and toluene (10 mL) was introduced into this tube under high vacuum by the trap-to-trap-transfer technique. The tube was flame-sealed, heated at 60 ºC for 48 h, and then opened under N2 in a glovebox. Volatiles were removed under reduced pressure, and the residue was extracted with pentane (5 mL × 2). The extract was filtered through a Celite pad. Cooling of the concentrated pentane solution at –30 ºC afforded orange crystals of **3**. Yield 22 mg (55%).

1H NMR (300 MHz, benzene-*d*6) ** 0.26, 0.34 (s, 3H×2, SiMe2), 1.50 (s, 15H, C5Me5), 1.77 (t, 3*J*HH = 5.4 Hz, 1H, H2), 3.74 (t, 3*J*HH = 5.6 Hz, 1H, H3), 5.30 (t, 3*J*HH = 6.3 Hz, 1H, H4), 5.47 (d, 3*J*HH = 7.1 Hz, 1H, H5), 5.73 (d, 3*J*HH = 5.3 Hz, 1H, H1), 6.89 (t, 3*J*HH = 7.2 Hz, 2H, *p*-NPh2), 7.06 (d, 3*J*HH = 7.2 Hz, 4H, *o*-NPh2), 7.13 (t, 3*J*HH = 7.2 Hz, 4H, *m*-NPh2); 13C{1H} NMR (75.5 MHz, benzene-*d*6) **–2.2, –1.1 (SiMe2), 9.8 (C5*Me*5), 90.6 (*C*5Me5), 45.1 (C2), 51.2 (C3), 76.9 (C1), 110.8 (C4), 121.1 (C5), 123.2 (*p*-NPh2), 125.4 (*o*-NPh2), 129.5 (*m*-NPh2), 148.4 (*ipso*-NPh2), 225.1 (CO); 29Si{1H} NMR (59.6 MHz, benzene-*d*6) ** –2.3 (SiMe2); IR (benzene-*d*6, cm-1) 1911 (vs, **CO); EI-Mass (70 eV) *m*/*z*: 524 (7, M+), 496 (14, M+–CO–Me–NC5H5), 402 (15, M+–CO–Me–NC5H5), 305 (75, [C5H5NSiMe2NPh2]+), 270 (17, M+–CO–SiMe2NPh2), 226 (100, [SiMe2NPh2]+). Anal. Calc. for C30H36FeN2OSi: C: 68.69, H: 6.92, N: 5.34. Found: C: 68.75, H: 6.72, N: 5.41.

**Synthesis of Cp*(CO)(C5H5N)FeSiMe2Cl (2-Cl).** Compound **2-Cl** (204 mg) was synthesized as orange crystals in 60% yield by a method similar to that for **2**,using Cp*(CO)2FeSiMe2Cl (295 mg, 0.866 mmol) and pyridine (5 mL , excess).

1H NMR (300 MHz, benzene-*d*6) ** 0.44, 1.07 (s, 3H×2, SiMe2), 1.49 (s, 15H, C5Me5), 6.07 (br, 2H, **-NC5H5), 6.50 (t, 3*J*HH = 7.5 Hz, 1H, **-NC5H5), 8.55 (br, 2H, **-NC5H5); 13C{1H} NMR (75.5 MHz, benzene-*d*6) **9.5 (C5*Me*5), 9.9, 10.3 (SiMe2), 91.4 (*C*5Me5), 123.7 (**-NC5H5), 134.6 (**-NC5H5), 157.4 (br, **-NC5H5), 220.3 (CO); 29Si{1H} NMR (59.6 MHz, benzene-*d*6) ** 99.0; IR (benzene-*d*6, cm-1) 1882 (vs, **CO); EI-Mass (70 eV) *m*/*z* 391 (7, M+), 284 (33, M+–CO–NC5H5), 190 (100, M+–CO–NC5H5–SiMe2Cl–H); Anal. Calc. for C18H26ClFeNOSi: C: 55.18, H: 6.69, N: 3.58. Found: C: 55.42, H: 6.82, N: 3.47.

**Synthesis of Cp*(CO)(C5H5N)FeSiMe3 (2-Me).** Compound **2-Me** (88 mg) was synthesized as purple crystals in 46% yield by a method similar to that for **2**,using Cp*(CO)2FeSiMe3 (166 mg, 0.518 mmol) and pyridine (2 mL, excess).

1H NMR (300 MHz, benzene-*d*6) ** 0.48 (s, 9H, SiMe3), 1.52 (s, 15H, C5Me5), 5.98 (t, 3*J*HH = 7.4 Hz, 2H, **-NC5H5), 6.47 (t, 3*J*HH = 7.4 Hz, 1H, **-NC5H5), 8.40 (br, 2H, **-NC5H5); 13C{1H} NMR (75.5 MHz, benzene-*d*6) **4.8 (SiMe3), 9.9 (C5*Me*5), 90.1 (*C*5Me5), 123.1 (**-NC5H5), 133.2 (**-NC5H5), 156.7 (**-NC5H5), 222.5 (CO); 29Si{1H} NMR (59.6 MHz, benzene-*d*6) ** 40.7; IR (benzene-*d*6, cm-1) 1873 (vs, **CO). EI-Mass (70 eV) *m*/*z* 371 (3, M+), 264 (18, M+–CO–NC5H5), 190 (100, M+–CO–NC5H5–SiMe3–H); Anal. Calc. for C19H29FeNOSi: C: 61.45, H: 7.87, N: 3.77. Found: C: 61.07, H: 8.06, N: 3.83.

**Synthesis of Cp*(CO)2FeSiMe2OMe.** An orange solution of Cp*(CO)2FeH (1.23 g, 4.96 mmol) in diethyl ether (50 mL) was cooled to –45 ºC and treated with *n*-BuLi (1.5 M hexane solution, 3.3 mL, 5.0 mmol). After stirring for 10 min at –45 ºC, the mixture turned to an orange suspension. ClSiMe2OMe (1.07 g, 8.59 mmol) was added dropwise to the suspension at –45 ºC and the solution was allowed to warm to room temperature. After stirring for 12 h, volatiles were evaporated under reduced pressure, and the residue was extracted with hexane (10 mL × 3). The extract was filtered through a Celite pad, and then the filtrate was concentrated in vacuo to dryness. Purification by flash　chromatography on silica-gel (toluene as eluent) gave two yellow bands. Evaporation of the solvent in vacuo from the first fraction and recrystallization from toluene/hexane (1:1) at –30 ºC yielded yellow crystals of Cp*(CO)2FeSiMe2Cl (107 mg, 6%). Evaporation of the solvent in vacuo from the second fraction afforded a yellow oil of **1-OMe** (752 mg, 45%). 1H NMR (300 MHz, benzene-*d*6) ** 0.68 (s, 6H, SiMe2), 1.56 (s, 15H, C5Me5), 3.44 (s, 3H, OMe); 13C{1H} NMR (75.5 MHz, benzene-*d*6) ** 7.0 (SiMe2), 9.7 (C5*Me*5), 50.6 (OMe), 95.2 (*C*5Me5), 217.7 (CO); 29Si{1H} NMR (59.6 MHz, benzene-*d*6) ** 69.0; IR (benzene-*d*6, cm-1) 1975, 1919 (vs, **CO); EI-Mass (70 eV) *m*/*z* 336 (47, M+), 321 (7, M+–Me), 308 (44, M+–CO), 280 (100, M+–2CO), 190 (79, M+–2CO–SiMe2OMe–H), 89 (19, [SiMe2OMe]+); Anal. Calcd for C15H24FeO3Si: C: 53.57, H: 7.19. Found: C: 53.96, H: 7.46.

**Synthesis of Cp*Fe(CO)(C5H5N)SiMe2OMe (2-OMe).** Compound **2-OMe** (136 mg) was synthesized as purple crystals in 50% yield by a method similar to that for **2** using Cp*(CO)2FeSiMe2OMe (237 mg, 0.705 mmol) and pyridine (2 mL, excess).

1H NMR (300 MHz, benzene-*d*6) ** 0.24, 0.72 (s, 3H×2, SiMe2), 1.52 (s, 15H, C5Me5), 3.63 (s, 3H, OMe), 6.07 (t, 3*J*HH = 6.9 Hz, 2H, **-NC5H5), 6.53 (t, 3*J*HH = 6.9 Hz, 1H, **-NC5H5), 8.59 (d, 3*J*HH = 6.9 Hz, 2H, **-NC5H5); 13C{1H} NMR (75.5 MHz, benzene-*d*6) **3.4, 4.2 (SiMe2), 9.8 (C5*Me*5), 50.9 (OMe), 90.6 (*C*5Me5), 123.2 (** -NC5H5), 133.7 (** -NC5H5), 156.6 (br, ** -NC5H5), 222.0 (CO); 29Si{1H} NMR (59.6 MHz, benzene-*d*6) ** 77.4; IR (benzene-*d*6, cm-1) 1873 (vs, **CO); EI-Mass (70 eV) *m*/*z* 387 (27, M+), 308 (50, M+–NC5H5), 280 (100, M+–CO–NC5H5), 190 (39, M+–CO–NC5H5–SiMe2OMe–H); Anal. Calc. for C19H29FeNO2Si: C: 58.91, H: 7.55, N: 3.62. Found: C: 58.41, H: 7.70, N: 3.53.

**Monitoring the thermal reaction of Cp*(CO)(C5H5N)FeSiMe2Cl (2-Cl).** A Pyrex NMR tube was charged with **2-Cl** (1.0 mg, 2.6 mol) and C6Me6 (0.5 mg, internal standard), and benzene-*d*6 (0.7 mL) was introduced into this tube under high vacuum by the trap-to-trap-transfer technique. The NMR tube was flame-sealed, then gradually heated to 90 ºC while monitoring the reaction by 1H NMR spectroscopy. At 60 ºC, there were no changes in the 1H NMR spectrum. After 24 h at 90 ºC, **2-Cl** was recovered in 79% NMR yield with the formation of [Cp*Fe(CO)2]2 (6%) and Cp*2Fe (3%). Unidentified signals were observed, but these signals were of low intensities. Prolonged heating led to decomposition of **2-Cl**, for which the NMR signals characteristic of the pyridine-insertion product were not detected at all.

**Monitoring the thermal reaction of Cp*(CO)(C5H5N)FeSiMe3 (2-Me).** A Pyrex NMR tube was charged with **2-Me** (1.0 mg, 2.7 mol) and C6Me6 (0.5 mg, internal standard), and benzene-*d*6 (0.7 mL) was introduced into this tube under high vacuum by the trap-to-trap-transfer technique. The NMR tube was flame-sealed in vacuo, then the sample was gradually heated to 90 ºC while monitoring the reaction by 1H NMR spectroscopy. At 60 ºC, there were no changes in the 1H NMR spectrum. After 24 h at 90 ºC, unidentified broad signals were observed in the 1H NMR spectrum, where **2-Me** remained in 40% NMR yield and the NMR signals characteristic of the pyridine-insertion product were not detected at all.

**Monitoring the thermal reaction of Cp*(CO)(C5H5N)FeSiMe2OMe (2-OMe).** A Pyrex NMR tube was charged with **2-OMe** (3.5 mg, 9.0 mol) and C6Me6 (0.5 mg, internal standard), and benzene-*d*6 (0.7 ml) was introduced into this tube under high vacuum by the trap-to-trap-transfer technique. The NMR tube was flame-sealed in vacuo, then the sample was gradually heated to 90 ºC while monitoring the reaction by 1H NMR spectroscopy. At 60 ºC, there were no changes in the 1H NMR spectrum. After 24 h at 90 °C, formation of Cp*(CO)Fe{*3(C,C,C)*-C5H5NSiMe2OMe} (**3-OMe**) was confirmed in 18% NMR yield together with Me2Si(OMe)2 (24%) and the recovered **2-OMe** (9%). Unidentified signals were observed but these signals were of low intensities. Prolonged heating for 36 h at 90 ºC resulted in the complete disappearance of **2-OMe** to afford **3-OMe** and Me2Si(OMe)2 in 16% and 28% yields, respectively.

**3-OMe**: 1H NMR (300 MHz, benzene-*d*6) ** 0.12, 0.31 (s, 3H×2, SiMe2), 1.53 (s, 15H, C5Me5), 3.39 (s, 3H, OMe), 1.79 (br, 1H, H2), 3.70 (br, 1H, H3), 5.21 (br, 1H, H4), 5.32 (br, 1H, H5), 5.62 (br, 1H, H1); 13C{1H} NMR (75.5 MHz, benzene-*d*6)  -3.4, -1.4 (SiMe2), 10.0 (C5*Me*5), 50.2 (OMe), 45.5 (C2), 51.0 (C3), 77.9 (C1), 110.3 (C4), 121.5 (C5); 29Si{1H} NMR (75.5 MHz, benzene-*d*6)  2.2.
